# Supplementary material for: Lipidomics Profile Changes of Type 2 Diabetes Mellitus with Acute Myocardial Infarction
Source: Hindawi journal article supplement (doi:10.1155/2019/7614715), 2019-11-16
Supplement: f1 [file 7614715.f1.pdf]

Table S1: Baseline characteristics of subjects participated in the study

| variable                 | The First Set                  |                             |              | The Second Set                  |                             |              |
|--------------------------|--------------------------------|-----------------------------|--------------|---------------------------------|-----------------------------|--------------|
|                          | T2DM with AMI                  | T2DM                        | ctrl         | T2DM with AMI                   | T2DM                        | ctrl         |
| N(male/female)           | 20/20                          | 20/20                       | 20/20        | 50/50                           | 50/50                       | 50/50        |
| age(years)               | 63.30±9.22                     | 63.00±7.93                  | 62.25±11.64  | 64.96±10.72 <sup>a</sup>        | 62.28±6.97                  | 63.16±8.75   |
| BMI (kg/m <sup>2</sup> ) | 26.56±3.78 <sup>a,bb</sup>     | 24.88±3.47                  | 24.27±3.61   | 25.96±3.24 <sup>aa,bbb</sup>    | 24.68±2.96                  | 23.86±3.61   |
| SBP (mmHg)               | 161.30±31.59 <sup>aa,bbb</sup> | 145.13±22.41 <sup>ccc</sup> | 123.03±6.90  | 162.42±30.10 <sup>aaa,bbb</sup> | 147.77±24.19 <sup>ccc</sup> | 126.60±13.52 |
| DBP (mmHg)               | 90.53±17.47 <sup>aa,bbb</sup>  | 80.73±12.85 <sup>c</sup>    | 76.30±5.07   | 90.32±17.94 <sup>aaa,bbb</sup>  | 81.65±13.67 <sup>cc</sup>   | 76.32±9.31   |
| FPG (mmol/L)             | 9.81±3.39 <sup>aaa,bbb</sup>   | 6.84±1.84 <sup>ccc</sup>    | 4.71±0.61    | 8.98±5.15 <sup>bbb</sup>        | 7.96±3.44 <sup>ccc</sup>    | 4.80±0.62    |
| TG (mmol/L)              | 1.77±1.48 <sup>b</sup>         | 1.32±0.61                   | 1.12±0.59    | 1.56±1.23 <sup>bb</sup>         | 1.47±0.92 <sup>c</sup>      | 1.19±0.65    |
| HDL-C (mmol/L)           | 1.10±0.20 <sup>aa,bbb</sup>    | 1.32±0.34 <sup>c</sup>      | 1.53±0.37    | 1.12±0.26 <sup>a,bbb</sup>      | 1.23±0.36 <sup>cc</sup>     | 1.39±0.35    |
| TC (mmol/L)              | 4.10±1.18                      | 4.37±0.73                   | 4.53±0.68    | 3.86±1.04 <sup>aaa,bbb</sup>    | 4.57±0.90 <sup>c</sup>      | 4.31±0.76    |
| LDL-C (mmol/L)           | 2.29±0.89                      | 2.49±0.52                   | 2.42±0.50    | 2.09±0.83 <sup>aaa,bb</sup>     | 2.74±0.70 <sup>ccc</sup>    | 2.38±0.59    |
| UA (μmol/L)              | 278.87±88.42                   | 289.84±63.94                | 285.44±67.51 | 327.62±95.23 <sup>bbb</sup>     | 312.99±70.89 <sup>cc</sup>  | 284.65±65.35 |

Values are presented as mean±standard deviation. The superscript letter(a, b and c) indicates significant difference between groups at P<0.05, respectively, according to ANOVA analysis. a, T2DM with AMI comparison with T2DM. b, T2DM with AMI comparison with health control group. c, T2DM comparison with health

control group. If  $P < 0.01$ , the letter doubled. If  $P < 0.001$ , the letter tripled. Abbreviations: BMI, body mass index; SBP, systolic blood pressure; DBP, diastolic blood pressure; FPG, fasting plasma glucose; TG, triglyceride; HDL-C, high density lipoprotein; TC, total cholesterol; LDL-C, low density lipoprotein; UA, uric acid.

Table S2: The identified compounds were distributed in 8 metabolic pathways.

|                                       | Total | Expected | Hits | Raw p     | -LOG(p) | Holm adjust | FDR     | Impact  |
|---------------------------------------|-------|----------|------|-----------|---------|-------------|---------|---------|
| Glycerophospholipid metabolism        | 39    | 0.097216 | 2    | 0.0036837 | 5.6038  | 0.2947      | 0.23125 | 0.1037  |
| Fatty acid biosynthesis               | 49    | 0.12214  | 2    | 0.0057812 | 5.1531  | 0.45672     | 0.23125 | 0       |
| Arachidonic acid metabolism           | 62    | 0.15455  | 2    | 0.0091619 | 4.6927  | 0.71463     | 0.24432 | 0.21669 |
| Linoleic acid metabolism              | 15    | 0.037391 | 1    | 0.036851  | 3.3009  | 1           | 0.73702 | 0       |
| Sphingolipid metabolism               | 25    | 0.062318 | 1    | 0.060784  | 2.8004  | 1           | 0.80248 | 0.00954 |
| Fatty acid elongation in mitochondria | 27    | 0.067304 | 1    | 0.06551   | 2.7255  | 1           | 0.80248 | 0       |
| alpha-Linolenic acid metabolism       | 29    | 0.072289 | 1    | 0.070217  | 2.6562  | 1           | 0.80248 | 0       |
| Fatty acid metabolism                 | 50    | 0.12464  | 1    | 0.11846   | 2.1332  | 1           | 1       | 0.02959 |

The potential biomarker, lysoPC(18:0/0:0), was distributed in the pathway of glycerophospholipid metabolism.
